# Supplementary material for: Identifying an Immune-Related Gene ST8SIA1 as a Novel Target in Patients With Clear-Cell Renal Cell Carcinoma
Source: Frontiers journal article supplement (doi:10.3389/fphar.2022.901518), 2022-07-07
Supplement: Image_3.pdf [file Image_3.pdf]

**QUESTION**

| Age Group | Gender | U.S. should take action | U.S. should not take action |
|-----------|--------|-------------------------|-----------------------------|
| 18-29     | Male   | 78%                     | 22%                         |
| 18-29     | Female | 82%                     | 18%                         |
| 30-49     | Male   | 75%                     | 25%                         |
| 30-49     | Female | 79%                     | 21%                         |
| 50-69     | Male   | 68%                     | 32%                         |
| 50-69     | Female | 72%                     | 28%                         |
| 70+       | Male   | 55%                     | 45%                         |
| 70+       | Female | 60%                     | 40%                         |

**1.1%**

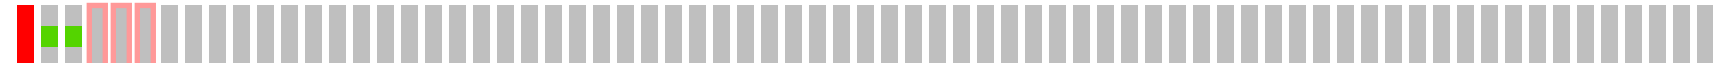

■ Missense Mutation (unknown significance) ■ Amplification ■ mRNA High ■ No alterations

Yes — No

Yes — No

Yes — No

Yes — No
